# Supplementary material for: A critical assessment of the mechanisms governing the formation of aqueous biphasic systems composed of protic ionic liquids and polyethylene glycol
Source: Royal Society of Chemistry journal article supplement (doi:10.1039/c6cp06289j), 2016-01-01
Supplement: c6cp06289j1.pdf [file c6cp06289j1.pdf]

# A critical assessment of the mechanisms governing the formation of aqueous biphasic systems composed of protic ionic liquids and polyethylene glycol

*Ana Filipa M. Cláudio<sup>1</sup>, Jorge F. B. Pereira<sup>2\*</sup>, Parker D. McCrary<sup>3</sup>, Mara G. Freire<sup>1</sup>, João A. P. Coutinho<sup>1</sup> and Robin D. Rogers<sup>3,4</sup>*

<sup>1</sup> Chemistry Department, CICECO, University of Aveiro, 3810-193 Aveiro, Portugal.

<sup>2</sup> Department of Bioprocess and Biotechnology, School of Pharmaceutical Sciences, UNESP – Univ Estadual Paulista, 14801-902 – Araraquara, SP, Brazil.

<sup>3</sup> Department of Chemistry, The University of Alabama, Tuscaloosa, AL 35487, USA.

<sup>4</sup> Department of Chemistry, McGill University, 801 Sherbrooke St. West, Montreal, QC Canada H3A 0B8.

\*Corresponding author

E-mail address: [jfbpereira@fcfar.unesp.br](mailto:jfbpereira@fcfar.unesp.br)

## Synthesis of PILs

### *Synthesis of N-propylammonium acetate, [C<sub>3</sub>NH<sub>3</sub>][OAc]*

Glacial acetic acid (300 mmol, 18.015 g) was placed in a 100 mL vial. N-propylamine (300 mmol, 17.733 g) was added. A yellow viscous oil was obtained with no mass loss for essentially a 100% yield. <sup>1</sup>H NMR (360 MHz, DMSO-*d*<sub>6</sub>) δ ppm: 9.37 (s, 3H, -NH<sub>3</sub><sup>+</sup>), 3.03 (t, 2H, -CH<sub>2</sub>-N), 2.09 (s, 3H, CH<sub>3</sub>-COO<sup>-</sup>), 1.92 (m, 2H, -CH<sub>2</sub>-), 1.19 (t, 3H, CH<sub>3</sub>-).

### *Synthesis of N-butylammonium acetate, [C<sub>4</sub>NH<sub>3</sub>][OAc]*

Glacial acetic acid (300 mmol, 17.155 mL) was placed in a 100 mL vial. N-butylamine (300 mmol, 29.650 mL) was added. A yellow viscous oil was obtained with no mass loss for essentially a 100% yield. TGA: *T*<sub>5% onset</sub> = 106 °C. DSC: No thermal transitions were observed. <sup>1</sup>H NMR (360 MHz, DMSO-*d*<sub>6</sub>) δ ppm: 8.24 (s, 3H, -NH<sub>3</sub><sup>+</sup>), 2.67 (t, 2H, -CH<sub>2</sub>-N), 1.69 (s, 3H, CH<sub>3</sub>-COO<sup>-</sup>), 1.49 (m, 2H, -CH<sub>2</sub>-), 1.31 (m, 2H, -CH<sub>2</sub>-), 0.86 (t, 3H, CH<sub>3</sub>-).

### *Synthesis of N-hexylammonium acetate, [C<sub>6</sub>NH<sub>3</sub>][OAc]*

Glacial acetic acid (300 mmol, 17.155 mL) was placed in a 100 mL vial. N-hexylamine (300 mmol, 39.635 mL) was added. A clear crystalline solid was obtained with no mass loss for essentially a 100% yield. DSC: *T*<sub>m</sub> = 326 K. <sup>1</sup>H NMR (360 MHz, DMSO-*d*<sub>6</sub>) δ ppm: 7.80 (s, 3H, -NH<sub>3</sub><sup>+</sup>), 2.66 (t, 2H, -CH<sub>2</sub>-N), 1.72 (s, 3H, CH<sub>3</sub>-COO<sup>-</sup>), 1.49 (m, 2H, -CH<sub>2</sub>-), 1.27 (m, 6H), 0.88 (t, 3H, CH<sub>3</sub>-).

### *Synthesis of N-octylammonium acetate, [C<sub>8</sub>NH<sub>3</sub>][OAc]*

Glacial acetic acid (300 mmol, 17.155 mL) was placed in a 100 mL vial. N-octylamine (300 mmol, 49.565 mL) was added. A clear crystalline solid was obtained with no mass loss for essentially a 100% yield. DSC: *T*<sub>m</sub> = 321 K. <sup>1</sup>H NMR (360 MHz, DMSO-*d*<sub>6</sub>) δ ppm: 7.16 (s, 3H, -NH<sub>3</sub><sup>+</sup>), 2.64 (t, 2H, -CH<sub>2</sub>-N), 1.73 (s, 3H, CH<sub>3</sub>-COO<sup>-</sup>), 1.46 (m, 2H, -CH<sub>2</sub>-), 1.25 (m, 8H, -CH<sub>2</sub>-CH<sub>2</sub>-CH<sub>2</sub>-CH<sub>2</sub>-), 0.87 (t, 3H, CH<sub>3</sub>-).

### *Synthesis of N-triethylammonium acetate, [C<sub>2</sub>C<sub>2</sub>C<sub>2</sub>NH][OAc]*

Glacial acetic acid (300 mmol, 17.157 mL) was placed in a 100 mL vial. N-triethylamine (300 mmol, 41.823 mL) was added drop-wise. An orange oil was obtained with no mass loss for essentially a 100% yield. <sup>1</sup>H NMR (360 MHz, DMSO-*d*<sub>6</sub>) δ ppm: 13.17 (s, 1H, -NH<sup>+</sup>), 3.46 (m, 8H, -CH<sub>2</sub>-N, -CH<sub>2</sub>-N, -CH<sub>2</sub>-N), 2.24 (t, 3H, CH<sub>3</sub>-COO<sup>-</sup>), 1.57 (m, 9H, CH<sub>3</sub>-, CH<sub>3</sub>-, CH<sub>3</sub>-).

*Synthesis of N-dipropylammonium acetate, [C<sub>3</sub>C<sub>3</sub>NH<sub>2</sub>][OAc]*

Glacial acetic acid (300 mmol, 17.157 mL) was placed in a 100 mL vial. N-dipropylamine (300 mmol, 41.134 mL) was added drop-wise. A clear crystalline solid was obtained with no mass loss for essentially a 100% yield. DSC:  $T_m = 326$  K. <sup>1</sup>H NMR (360 MHz, *DMSO-d6*)  $\delta$  ppm: 11.67 (s, 2H, -NH<sub>2</sub><sup>+</sup>), 3.24 (m, 4H, -CH<sub>2</sub>-N, -CH<sub>2</sub>-N), 2.23 (s, 3H, CH<sub>3</sub>-COO<sup>-</sup>), 2.06 (m, 4H, -CH<sub>2</sub>-, -CH<sub>2</sub>-), 1.28 (t, 6H, CH<sub>3</sub>-, CH<sub>3</sub>-).

*Synthesis of ammonium butanoate, [NH<sub>4</sub>][But]*

Butanoic acid (300 mmol, 27.550 mL) was placed in a 100 mL vial. Ammonium in water (25% w/w) (300 mmol, 22.458 mL) was added drop-wise. A transparent viscous oil was observed with no mass loss for essentially a 100% yield. <sup>1</sup>H NMR (360 MHz, *DMSO-d6*)  $\delta$  ppm: 9.20 (s, 4H, -NH<sub>4</sub><sup>+</sup>), 2.48 (t, 2H, CH<sub>2</sub>-COO<sup>-</sup>), 1.85 (m, 2H, -CH<sub>2</sub>-), 1.20 (m, 3H, CH<sub>3</sub>-).

*Synthesis of N-propylammonium butanoate, [C<sub>3</sub>NH<sub>3</sub>][But]*

Butanoic acid (300 mmol, 27.550 mL) was placed in a 100 mL vial. N-propylamine (300 mmol, 24.663 mL) was added drop-wise. A yellow viscous oil was obtained with no mass loss for essentially a 100% yield. <sup>1</sup>H NMR (360 MHz, *DMSO-d6*)  $\delta$  ppm: 9.54 (s, 3H, -NH<sub>3</sub><sup>+</sup>), 3.05 (t, 2H, -CH<sub>2</sub>-N), 2.26 (t, 2H, CH<sub>2</sub>-COO<sup>-</sup>), 1.96 (m, 2H, -CH<sub>2</sub>-), 1.79 (m, 2H, -CH<sub>2</sub>-), 1.19 (m, 3H, CH<sub>3</sub>-), 1.15 (m, 3H, CH<sub>3</sub>-).

*Synthesis of N-hexylammonium butanoate, [C<sub>6</sub>NH<sub>3</sub>][But]*

Butyric acid (300 mmol, 27.550 mL) was placed in a 100 mL vial. N-hexylamine (300 mmol, 39.634 mL) was added drop-wise. A white viscous oil was obtained with no mass loss for essentially a 100% yield. <sup>1</sup>H NMR (360 MHz, *DMSO-d6*)  $\delta$  ppm: 9.45 (s, 3H, -NH<sub>3</sub><sup>+</sup>), 3.08 (t, 2H, -CH<sub>2</sub>-N), 2.27 (t, 2H, CH<sub>2</sub>-COO<sup>-</sup>), 1.95 (m, 2H, -CH<sub>2</sub>-), 1.81 (m, 2H, -CH<sub>2</sub>-), 1.57 (m, 6H, -CH<sub>2</sub>-CH<sub>2</sub>-CH<sub>2</sub>-), 1.16 (m, 6H, CH<sub>3</sub>-, CH<sub>3</sub>-).

*Synthesis of N-octylammonium butanoate, [C<sub>8</sub>NH<sub>3</sub>][But]*

Butyric acid (300 mmol, 27.550 mL) was placed in a 100 mL vial. N-octylamine (300 mmol, 49.565 mL) was added. A clear crystalline solid was observed with no mass loss for essentially a 100% yield. DSC:  $T_m = 305$  K. <sup>1</sup>H NMR (360 MHz, *DMSO-d6*)  $\delta$  ppm: 9.42 (s, 3H, -NH<sub>3</sub><sup>+</sup>), 3.07 (t, 2H, -CH<sub>2</sub>-N), 2.33 (t, 2H, CH<sub>2</sub>-COO<sup>-</sup>), 1.94 (m, 2H, -CH<sub>2</sub>-), 1.81 (m, 2H, -CH<sub>2</sub>-), 1.56 (m, 10H, -CH<sub>2</sub>-CH<sub>2</sub>-CH<sub>2</sub>-CH<sub>2</sub>-CH<sub>2</sub>-), 1.15 (m, 6H, CH<sub>3</sub>-, CH<sub>3</sub>-).

*Synthesis of N-butylammonium propanoate, [C<sub>4</sub>NH<sub>3</sub>][Pro]*

Propionic acid (300 mmol, 22.228 g) was placed in a 100 mL vial. N-butylamine (300 mmol, 21.942 g) was added drop-wise. A yellow viscous oil was obtained with no mass loss for essentially a 100% yield. <sup>1</sup>H

NMR (360 MHz, *DMSO-d6*)  $\delta$  ppm: 9.39 (s, 3H,  $-\text{NH}_3^+$ ), 3.09 (t, 2H,  $-\text{CH}_2\text{-N}$ ), 2.34 (t, 2H,  $\text{CH}_2\text{-COO}^-$ ), 1.92 (m, 2H,  $-\text{CH}_2-$ ), 1.63 (m, 2H,  $-\text{CH}_2-$ ), 1.27 (m, 3H,  $\text{CH}_3-$ ), 1.16 (m, 3H,  $\text{CH}_3-$ ).

#### *Synthesis of N-butylammonium butanoate, $[\text{C}_4\text{NH}_3][\text{But}]$*

Butyric acid (300 mmol, 26.433 g) was placed in a 100 mL vial. N-butylamine (300 mmol, 21.942 g) was added drop-wise. A yellow viscous oil was obtained with no mass loss for essentially a 100% yield.  $^1\text{H}$  NMR (360 MHz, *DMSO-d6*)  $\delta$  ppm: 9.40 (s, 3H,  $-\text{NH}_3^+$ ), 3.08 (t, 2H,  $-\text{CH}_2\text{-N}$ ), 2.32 (t, 2H,  $\text{CH}_2\text{-COO}^-$ ), 1.92 (m, 2H,  $-\text{CH}_2-$ ), 1.81 (m, 2H,  $-\text{CH}_2-$ ), 1.64 (m, 2H,  $-\text{CH}_2-$ ), 1.16 (m, 6H,  $\text{CH}_3-$ ,  $\text{CH}_3-$ ).

#### *Synthesis of N-butylammonium hexanoate, $[\text{C}_4\text{NH}_3][\text{Hex}]$*

Hexanoic acid (300 mmol, 34.848 g) was placed in a 100 mL vial. N-butylamine (300 mmol, 21.942 g) was added drop-wise. A yellow viscous oil was obtained with no mass loss for essentially a 100% yield.  $^1\text{H}$  NMR (360 MHz, *DMSO-d6*)  $\delta$  ppm: 9.51 (s, 3H,  $-\text{NH}_3^+$ ), 3.08 (t, 2H,  $-\text{CH}_2\text{-N}$ ), 2.35 (t, 2H,  $\text{CH}_2\text{-COO}^-$ ), 1.93 (m, 2H,  $-\text{CH}_2-$ ), 1.81 (m, 2H,  $-\text{CH}_2-$ ), 1.65 (m, 2H,  $-\text{CH}_2-$ ), 1.57 (m, 4H,  $-\text{CH}_2\text{-CH}_2-$ ), 1.17 (m, 6H,  $\text{CH}_3-$ ,  $\text{CH}_3-$ ).

## **Characterization of PILs**

### *Differential Scanning Calorimetry (DSC)*

Characterization measurements of solids PILs were performed on a TA instruments Differential Scanning Calorimeter (DSC) 2920 Modulated DSC, TA Instruments, Inc. (New Castle, DE) cooled with a liquid nitrogen cryostat. The calorimeter for temperature and cell constants was calibrated using indium. Samples of each PIL or salt were carefully weighted and sealed in aluminium pans (5 – 15 mg), with a hole in the top to allow gases to escape, and heated at a rate of 5 °C/min up to 100 °C. Following the initial heating cycle the samples were cooled to -100 °C followed by a heating cycle to 100 °C at a rate of 5 °C/min. After each dynamic temperature ramp, a 5 min isotherm was employed to ensure the temperature equilibrium in the cell. The entire cycle was repeated twice and phase changes values determined. An empty aluminium pan was used as reference.

### *Proton and Carbon Nuclear Magnetic Resonance ( $^1\text{H}$ and $^{13}\text{C}$ NMR)*

Nuclear Magnetic Resonance spectra were obtained utilizing a BrukerAvance NMR spectrometer (Karlsruhe, Germany) at 500 MHz for  $^1\text{H}$  NMR spectroscopy and 125 MHz for  $^{13}\text{C}$  NMR spectroscopy. Each PIL liquid at room temperature was loaded solvent-less in a flame-sealed capillary by using  $\text{CDCl}_3$  as

the external lock. The PILs solid at room temperature were dissolved in DMSO-d<sub>6</sub> or D<sub>2</sub>O-d<sub>2</sub>, with TMS as the internal standard, for analysis.

#### *Water content*

The water content of all PILs was measured by Karl-Fischer titration and was taken into account during the preparation of each aqueous solution, and considered in the determination of the ternary phase diagrams.

#### *pH determination*

The pH ( $\pm 0.02$ ) of the initial aqueous solutions (in the monophasic region) used for the determination of the phase diagrams by the titration method was measured at 298 K ( $\pm 1$  K) using a SevenMulti<sup>TM</sup> (Mettler Toledo Instruments). The calibration of the pH meter was carried out using three buffers (pH values of 4.00, 7.00 and 9.00).

## Results.

**Table S1.** Weight fraction data for the ternary system composed of  $[\text{NH}_4][\text{OAc}]$  (1) + PEG-2000 (2) +  $\text{H}_2\text{O}$  (3) at 323, 333 and 343 K.

| 323 K     |           | 333 K     |           | 343 K     |           |
|-----------|-----------|-----------|-----------|-----------|-----------|
| 100 $w_1$ | 100 $w_2$ | 100 $w_1$ | 100 $w_2$ | 100 $w_1$ | 100 $w_2$ |
| 19.0571   | 59.0356   | 31.8562   | 32.5450   | 19.6689   | 40.9864   |
| 51.5801   | 10.3637   | 33.2813   | 28.7897   | 29.7063   | 22.7502   |
| 42.4561   | 19.4022   | 21.8826   | 48.0073   | 33.8448   | 14.5015   |
| 25.8337   | 45.8007   | 29.9584   | 35.2604   | 41.4202   | 7.3336    |
| 33.3135   | 32.6215   | 15.6463   | 60.4096   | 23.3809   | 35.8684   |
| 20.7325   | 55.2423   | 20.4122   | 50.4708   | 15.5315   | 51.0040   |
| 31.3605   | 35.4428   | 15.9597   | 59.6877   |           |           |
| 45.7692   | 16.9321   | 29.9025   | 15.9597   |           |           |

**Table S2.** Weight fraction data for the ternary system composed of  $[\text{C}_3\text{NH}_3][\text{OAc}]$  (1) + PEG-2000 (2) +  $\text{H}_2\text{O}$  (3) at 323, 333 and 343 K.

| 323 K     |           | 333 K     |           | 343 K     |           |
|-----------|-----------|-----------|-----------|-----------|-----------|
| 100 $w_1$ | 100 $w_2$ | 100 $w_1$ | 100 $w_2$ | 100 $w_1$ | 100 $w_2$ |
| 32.2480   | 49.1876   | 54.4534   | 22.2790   | 19.1924   | 66.5731   |
| 48.7869   | 30.8830   | 39.8820   | 39.8191   | 28.6930   | 52.9489   |
| 43.4732   | 37.1139   | 34.2976   | 47.0872   | 40.1807   | 38.4052   |
| 45.5030   | 34.6845   | 24.8649   | 59.1303   | 54.1432   | 22.0215   |
| 39.1158   | 42.8019   | 19.5682   | 67.7146   | 59.7344   | 15.7777   |
| 18.6792   | 69.3159   | 46.8797   | 32.4126   | 32.5506   | 47.8970   |
| 26.9044   | 57.6662   |           |           | 48.4868   | 27.9201   |

**Table S3.** Weight fraction data for the ternary system composed of [C<sub>4</sub>NH<sub>3</sub>][OAc] (1) + PEG-2000 (2) + H<sub>2</sub>O (3) at 323, 333 and 343 K.

| 323 K     |           | 333 K     |           | 343 K     |           |
|-----------|-----------|-----------|-----------|-----------|-----------|
| 100 $w_1$ | 100 $w_2$ | 100 $w_1$ | 100 $w_2$ | 100 $w_1$ | 100 $w_2$ |
| 65.9414   | 16.9135   | 10.6869   | 83.7239   | 10.3043   | 84.3595   |
| 55.5276   | 28.4606   | 18.4168   | 71.9734   | 19.9640   | 70.0576   |
| 46.6962   | 38.1847   | 26.0215   | 61.8665   | 25.6261   | 62.6943   |
| 36.4099   | 50.6936   | 34.4792   | 50.7473   | 35.1369   | 50.6468   |
| 22.9590   | 66.7180   | 43.2017   | 40.6064   | 41.7378   | 42.0525   |
| 68.4997   | 14.4647   | 50.0500   | 32.4593   | 49.8343   | 32.3990   |
| 60.5142   | 22.9462   | 56.6482   | 25.1271   | 58.3393   | 23.3316   |
| 50.7237   | 34.2265   | 65.4270   | 15.1698   | 58.8078   | 22.5009   |
| 41.6359   | 44.4263   | 73.6368   | 8.4188    | 68.6284   | 11.3153   |

**Table S4.** Weight fraction data for the ternary system composed of [C<sub>6</sub>NH<sub>3</sub>][OAc] (1) + PEG-2000 (2) + H<sub>2</sub>O (3) at 313, 323, 333 and 343 K.

| 313 K     |           | 323 K     |           | 333 K     |           | 343 K     |           |
|-----------|-----------|-----------|-----------|-----------|-----------|-----------|-----------|
| 100 $w_1$ | 100 $w_2$ |
| 65.1880   | 12.8578   | 58.7432   | 23.3052   | 34.1934   | 51.7310   | 62.2475   | 21.2028   |
| 51.0630   | 27.7721   | 47.7775   | 35.3478   | 64.0178   | 18.8446   | 51.8040   | 32.3903   |
| 27.9260   | 50.3323   | 42.3815   | 40.8861   | 30.5686   | 56.2230   | 43.8880   | 41.0582   |
| 15.6300   | 66.8714   | 55.1993   | 27.1740   | 67.1663   | 15.3696   | 38.5105   | 47.1826   |
| 18.9670   | 60.8661   | 63.1755   | 19.1051   | 61.4805   | 20.9516   | 18.1705   | 74.2477   |
|           |           | 32.5180   | 52.3198   | 51.2120   | 32.0353   | 18.6854   | 73.9177   |
|           |           | 52.4930   | 30.4357   | 43.4019   | 40.6228   | 76.4035   | 9.6909    |
|           |           | 65.5732   | 16.5931   | 38.3056   | 46.9542   |           |           |
|           |           | 25.5616   | 61.5299   |           |           |           |           |
|           |           | 21.5581   | 67.2910   |           |           |           |           |
|           |           | 66.7575   | 15.2761   |           |           |           |           |
|           |           | 60.9145   | 20.7588   |           |           |           |           |
|           |           | 51.0135   | 31.8230   |           |           |           |           |
|           |           | 43.1310   | 40.3689   |           |           |           |           |

**Table S5.** Weight fraction data for the ternary system composed of [C<sub>4</sub>NH<sub>3</sub>][But] (1) + PEG-2000 (2) + H<sub>2</sub>O (3) at 323, 333 and 343 K.

| 323 K     |           | 333 K     |           | 343 K     |           |
|-----------|-----------|-----------|-----------|-----------|-----------|
| 100 $w_1$ | 100 $w_2$ | 100 $w_1$ | 100 $w_2$ | 100 $w_1$ | 100 $w_2$ |
| 18.3657   | 73.3218   | 12.1640   | 82.2192   | 18.6854   | 73.9177   |
| 27.2236   | 61.0389   | 19.1258   | 71.5494   | 26.8549   | 63.1006   |
| 34.9885   | 51.8855   | 26.5212   | 62.0305   | 35.8336   | 52.4777   |
| 58.0527   | 25.5716   | 45.2480   | 40.8825   | 43.6680   | 43.2358   |
| 76.7577   | 8.6059    | 50.8088   | 34.2322   | 52.0391   | 34.5412   |
| 43.4334   | 42.7715   | 58.8314   | 25.5709   | 58.8183   | 28.5255   |
| 52.3220   | 32.9693   | 68.0163   | 16.4728   | 68.7164   | 17.3123   |
| 65.3617   | 18.3658   | 74.1672   | 10.0502   |           |           |
| 66.4165   | 18.1190   |           |           |           |           |

**Table S6.** Weight fraction data for the ternary system composed of [C<sub>4</sub>NH<sub>3</sub>][Pro] (1) + PEG-2000 (2) + H<sub>2</sub>O (3) at 323, 333 and 343 K.

| 323 K     |           | 333 K     |           | 343 K     |           |
|-----------|-----------|-----------|-----------|-----------|-----------|
| 100 $w_1$ | 100 $w_2$ | 100 $w_1$ | 100 $w_2$ | 100 $w_1$ | 100 $w_2$ |
| 75.9140   | 8.5207    | 9.3658    | 85.7627   | 11.1712   | 82.8446   |
| 58.5871   | 25.6276   | 21.0623   | 70.6054   | 18.1282   | 74.0322   |
| 52.7205   | 32.2800   | 26.8341   | 62.5634   | 30.8424   | 58.2475   |
| 43.5107   | 42.7820   | 34.8845   | 52.3098   | 36.8617   | 51.6602   |
| 36.1269   | 51.0039   | 43.0496   | 43.3885   | 44.0703   | 43.2475   |
| 28.6189   | 60.6282   | 50.6802   | 33.5565   | 60.0536   | 24.9837   |
| 18.3139   | 73.9166   | 60.5089   | 23.4414   | 66.9564   | 17.4618   |
| 69.4079   | 14.7306   | 66.6412   | 16.5842   | 75.7718   | 8.9395    |
|           |           | 74.9542   | 8.8914    |           |           |

**Table S7.** Weight fraction data for the ternary system composed of [C<sub>3</sub>NH<sub>3</sub>][But] (1) + PEG-2000 (2) + H<sub>2</sub>O (3) at 323, 333 and 343 K.

| 323 K                     |                           | 333 K                     |                           | 343 K                     |                           |
|---------------------------|---------------------------|---------------------------|---------------------------|---------------------------|---------------------------|
| 100 <i>w</i> <sub>1</sub> | 100 <i>w</i> <sub>2</sub> | 100 <i>w</i> <sub>1</sub> | 100 <i>w</i> <sub>2</sub> | 100 <i>w</i> <sub>1</sub> | 100 <i>w</i> <sub>2</sub> |
| 59.3252                   | 25.8385                   | 26.8537                   | 63.6596                   | 23.0142                   | 69.1179                   |
| 19.6495                   | 71.1870                   | 35.6653                   | 52.5161                   | 27.6222                   | 63.1106                   |
| 33.9115                   | 53.7087                   | 44.3632                   | 43.2081                   | 36.2112                   | 52.6200                   |
| 36.9585                   | 50.3080                   | 53.5070                   | 32.9179                   | 44.8068                   | 43.1020                   |
| 50.1825                   | 36.1902                   | 60.5645                   | 25.0826                   | 52.1530                   | 34.3266                   |
|                           |                           |                           |                           | 60.5045                   | 25.7346                   |

**Table S8.** Weight fraction data for the ternary system composed of [C<sub>8</sub>NH<sub>3</sub>][OAc], [C<sub>6</sub>NH<sub>3</sub>][But], [C<sub>8</sub>NH<sub>3</sub>][But] and [C<sub>4</sub>NH<sub>3</sub>][Hex] (1) + PEG-2000 (2) + H<sub>2</sub>O (3) at 323 K.

| [C <sub>8</sub> NH <sub>3</sub> ][OAc] |                           | [C <sub>6</sub> NH <sub>3</sub> ][But] |                           | [C <sub>8</sub> NH <sub>3</sub> ][But] |                           | [C <sub>4</sub> NH <sub>3</sub> ][Hex] |                           |
|----------------------------------------|---------------------------|----------------------------------------|---------------------------|----------------------------------------|---------------------------|----------------------------------------|---------------------------|
| 100 <i>w</i> <sub>1</sub>              | 100 <i>w</i> <sub>2</sub> |
| 23.9853                                | 54.3066                   | 35.9266                                | 36.1627                   | 15.4517                                | 54.7840                   | 9.3899                                 | 81.9170                   |
| 27.6235                                | 48.1338                   | 42.6797                                | 27.8771                   | 21.1941                                | 48.3347                   | 19.0195                                | 67.2323                   |
| 37.0421                                | 36.9329                   | 49.3903                                | 21.4054                   | 38.5815                                | 33.1897                   | 24.9684                                | 57.5769                   |
| 39.8662                                | 33.7663                   | 53.9641                                | 16.7127                   | 59.9768                                | 14.8823                   | 31.8814                                | 45.3892                   |
| 55.2775                                | 18.5752                   | 26.9716                                | 46.7228                   | 20.7737                                | 50.3444                   | 37.3136                                | 37.1814                   |
| 58.7654                                | 15.5066                   | 37.2980                                | 33.6823                   | 52.0304                                | 20.5489                   | 44.5446                                | 29.0263                   |
| 25.2152                                | 53.4454                   | 47.2916                                | 22.7760                   | 31.2887                                | 38.8243                   | 53.1422                                | 20.9456                   |
| 31.3087                                | 44.7039                   |                                        |                           | 39.3675                                | 31.6984                   | 58.9000                                | 15.0533                   |
| 29.0481                                | 47.3945                   |                                        |                           |                                        |                           | 71.4009                                | 7.3504                    |
| 53.8383                                | 20.4216                   |                                        |                           |                                        |                           |                                        |                           |
| 21.1202                                | 59.8030                   |                                        |                           |                                        |                           |                                        |                           |
| 62.5798                                | 12.5417                   |                                        |                           |                                        |                           |                                        |                           |

**Table S9.** pH values in the monophasic region and minimum concentration point (*MC*) of each PIL-based ABS. The pH values were determined at 323 K as the average of, at least, three independent mixtures.

| System                                 | pH          |       | <i>MC</i> |       |
|----------------------------------------|-------------|-------|-----------|-------|
|                                        | 323 K       | 323 K | 333 K     | 343 K |
| [NH <sub>4</sub> ][OAc]                | 7.77 ± 0.13 | 24.02 | 21.66     | 13.13 |
| [C <sub>3</sub> NH <sub>3</sub> ][OAc] | 7.37 ± 0.21 | 44.74 | 38.90     | 34.93 |
| [C <sub>4</sub> NH <sub>3</sub> ][OAc] | 7.26 ± 0.03 | 51.22 | 43.64     | 43.03 |
| [C <sub>6</sub> NH <sub>3</sub> ][OAc] | 7.57 ± 0.43 | 43.03 | 43.03     | 49.00 |
| [C <sub>4</sub> NH <sub>3</sub> ][Pro] | 7.98 ± 0.18 | 50.01 | 47.61     | 51.84 |
| [C <sub>4</sub> NH <sub>3</sub> ][But] | 8.14 ± 0.07 | 49.42 | 49.48     | 64.14 |
| [C <sub>3</sub> NH <sub>3</sub> ][But] | 8.31 ± 0.04 | 63.25 | 64.62     | 66.65 |
| [C <sub>6</sub> NH <sub>3</sub> ][But] | 7.90 ± 0.15 | 21.29 | -         | -     |
| [C <sub>8</sub> NH <sub>3</sub> ][But] | 8.00 ± 0.16 | 23.38 | -         | -     |
| [C <sub>4</sub> NH <sub>3</sub> ][Hex] | 8.07 ± 0.18 | 22.71 | -         | -     |
| [C <sub>8</sub> NH <sub>3</sub> ][OAc] | 7.85 ± 0.19 | 25.44 | -         | -     |
